# Supplementary material
Source: publisher figshare collection journal article supplement (https://acs.figshare.com/ndownloader/files/3582654)

## Supporting Information

Song et al

### Part I

HPLC profiles of GGAEAB glycan **1-26**:

Column: Hypercarb Porous graphitized carbon (PGC) (150mm x 4.6 mm)

Solvent: Water, acetonitrile, 0.1% TFA;

Linear gradient:

0 min: 15% acetonitrile, 0.1% TFA; 20min: 35% acetonitrile, 0.1% TFA; 20.1 min: 15% acetonitrile, 0.1% TFA.

Detection: UV 330nm.

**1**

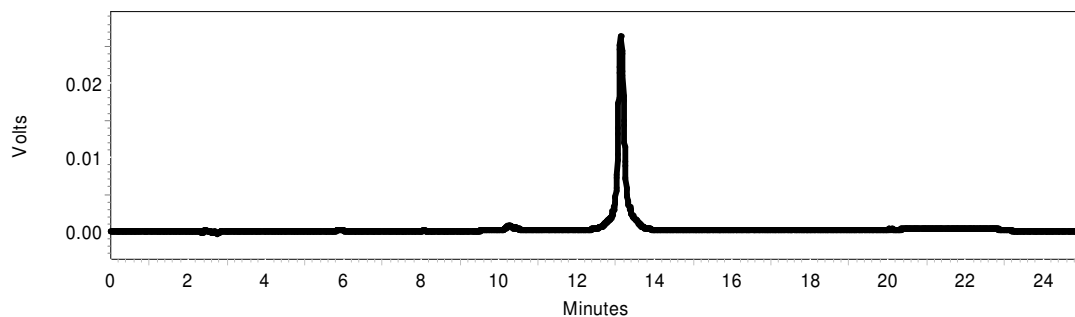

**2**

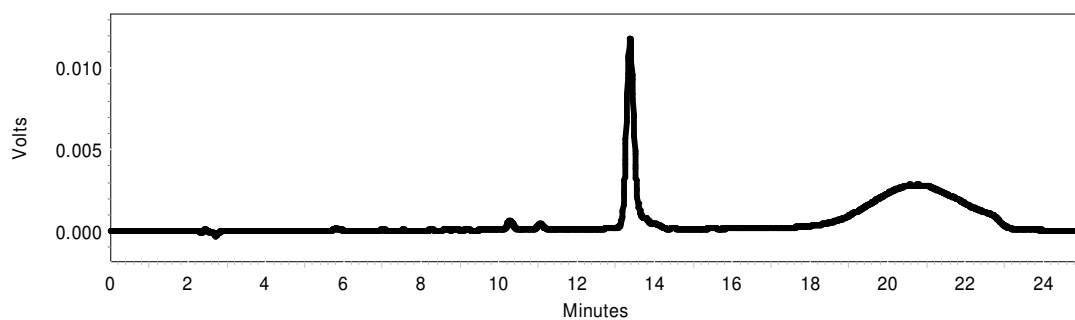

3

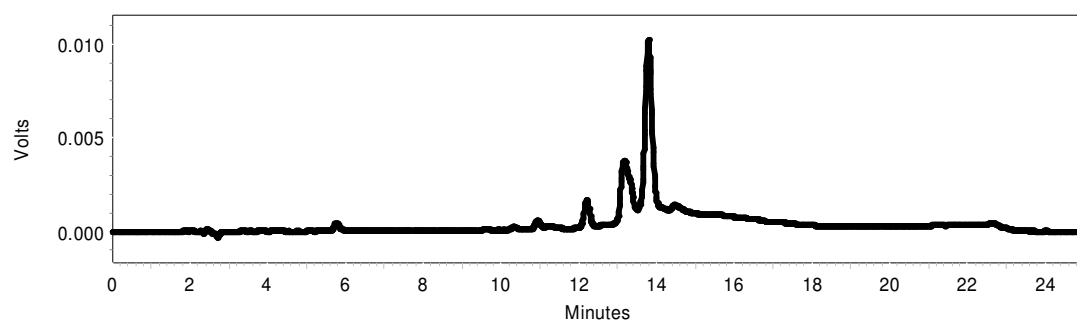

4

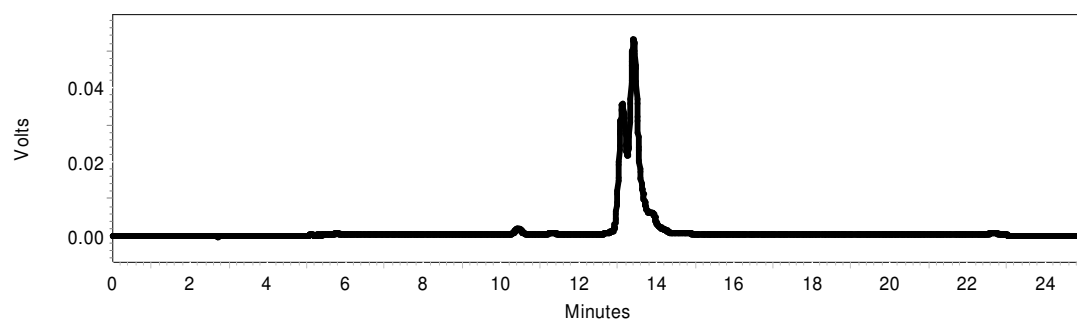

5

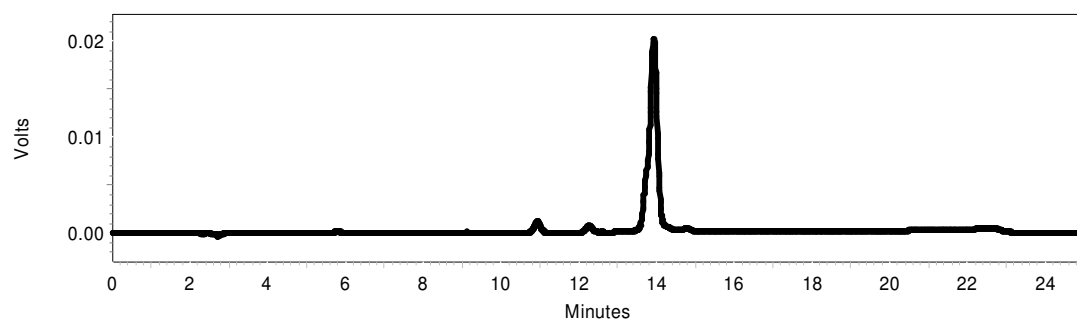

6

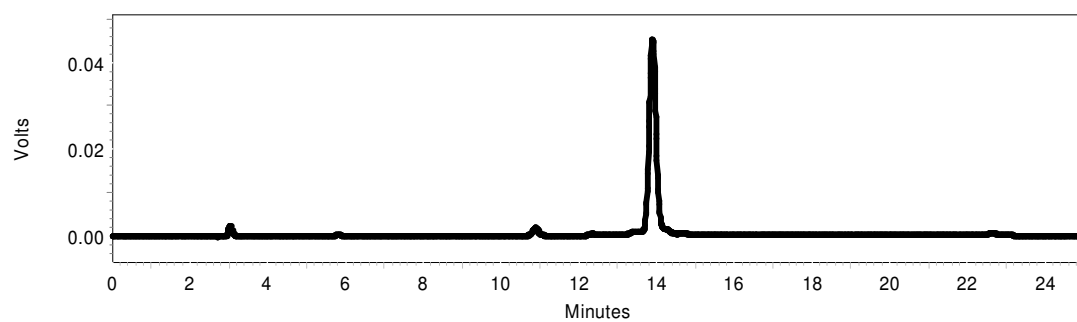

7

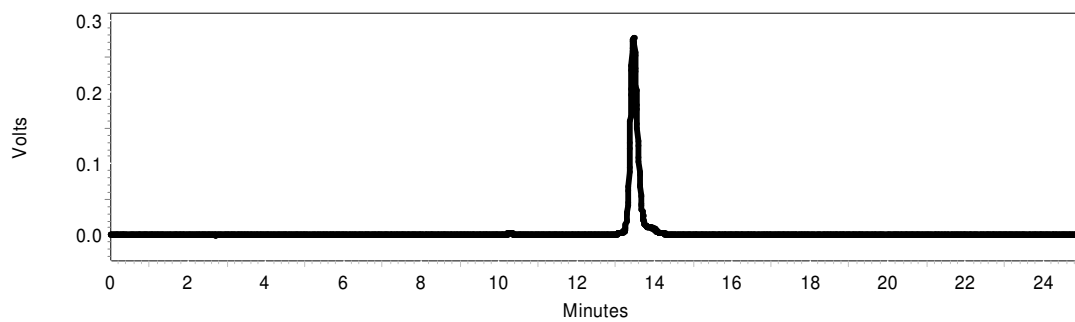

8

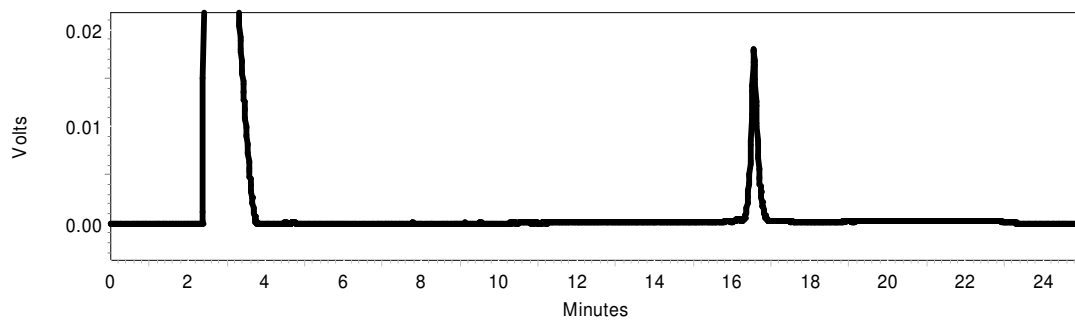

9

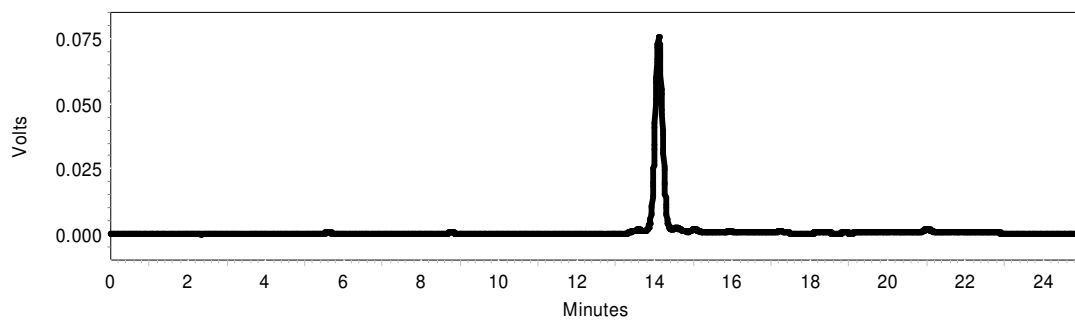

10

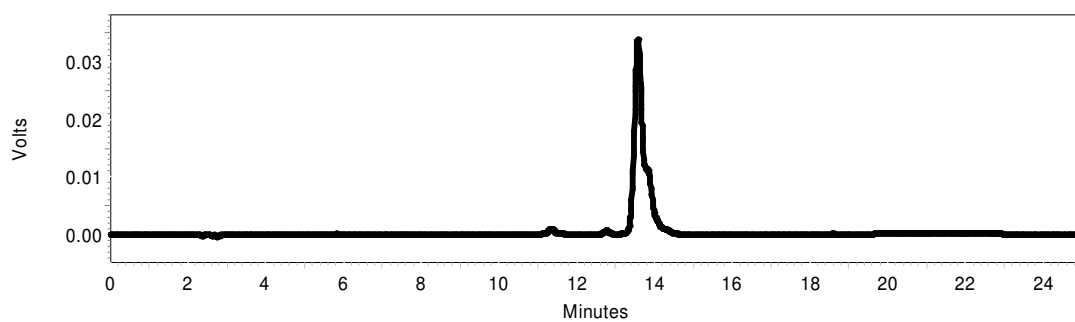

11

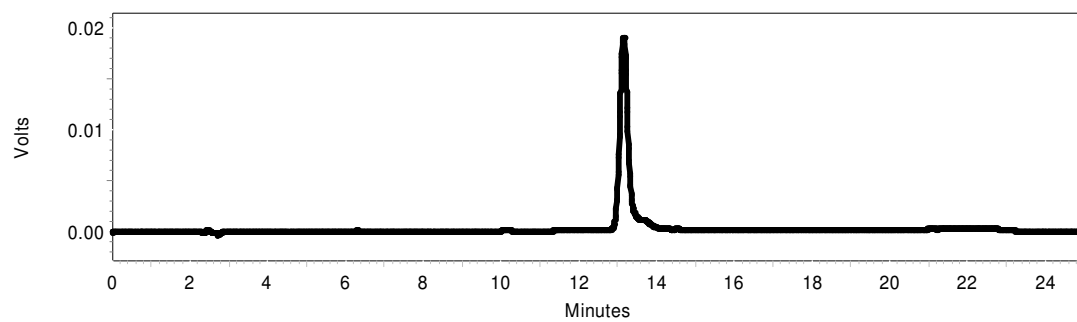

12

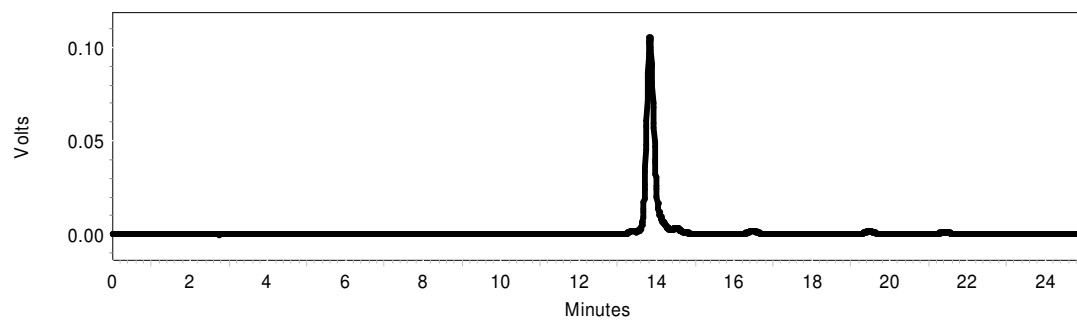

13

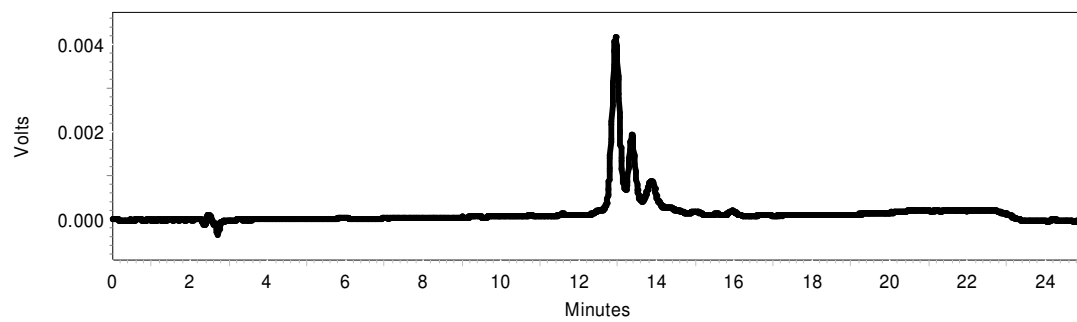

14

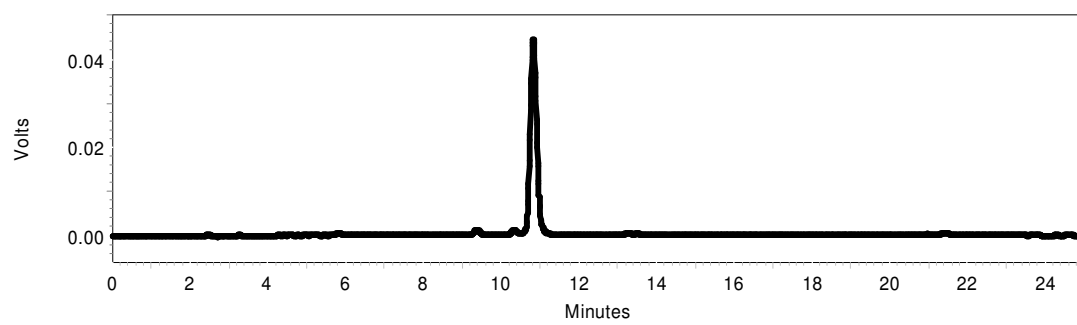

15

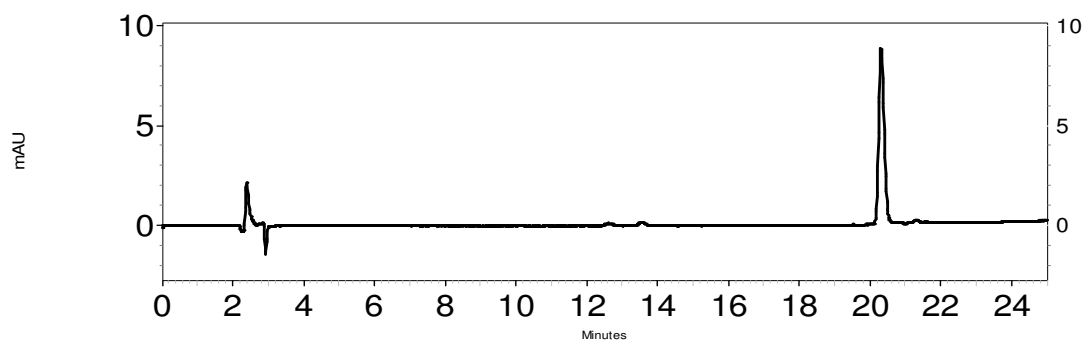

16

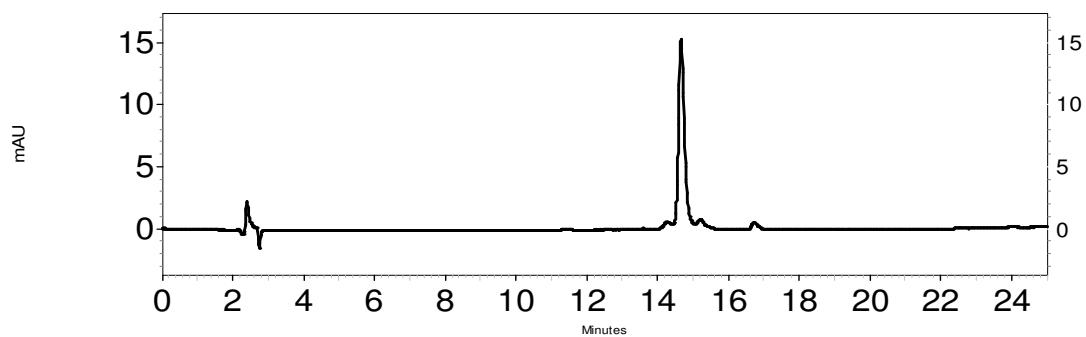

17

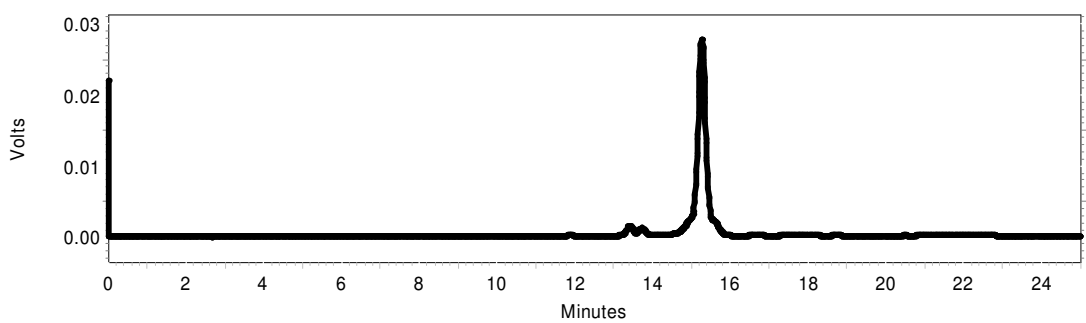

18

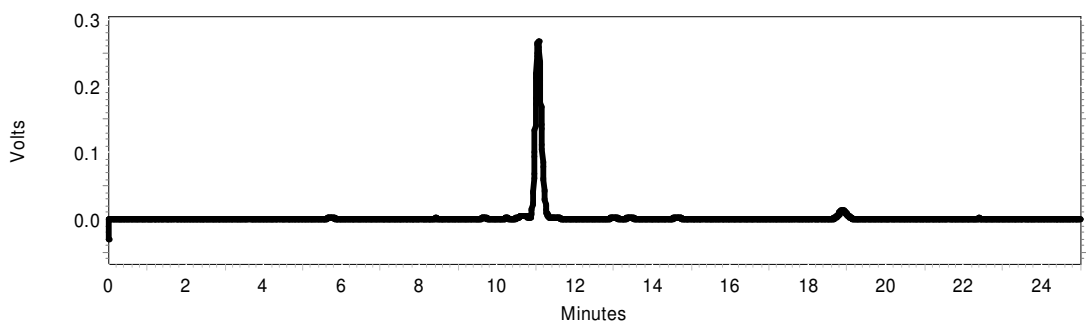

19

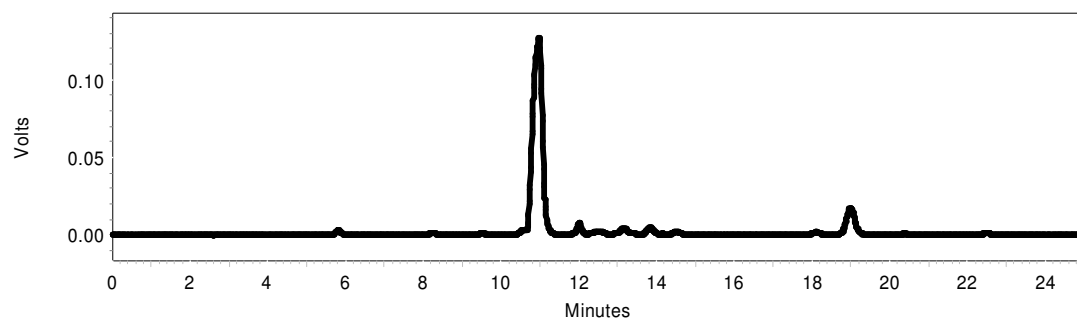

20

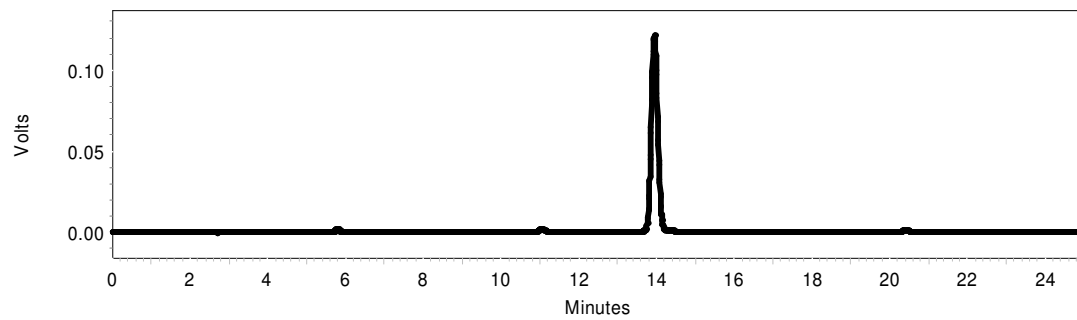

21

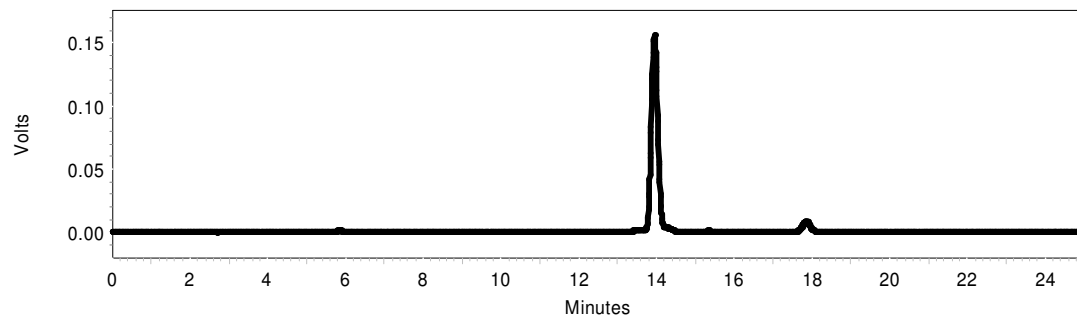

22

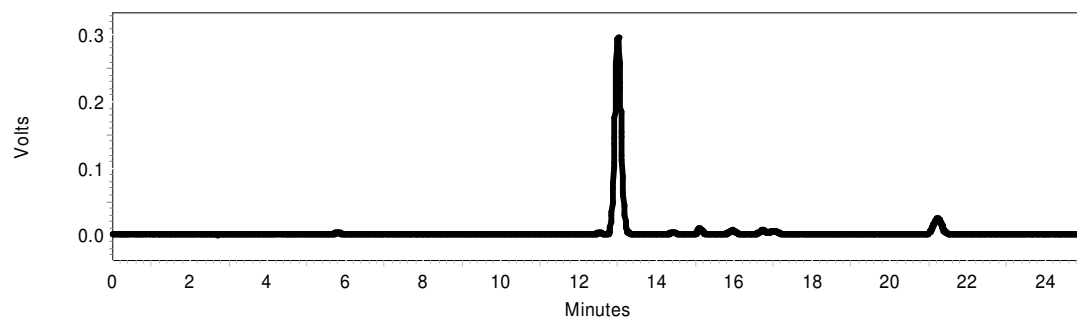

23

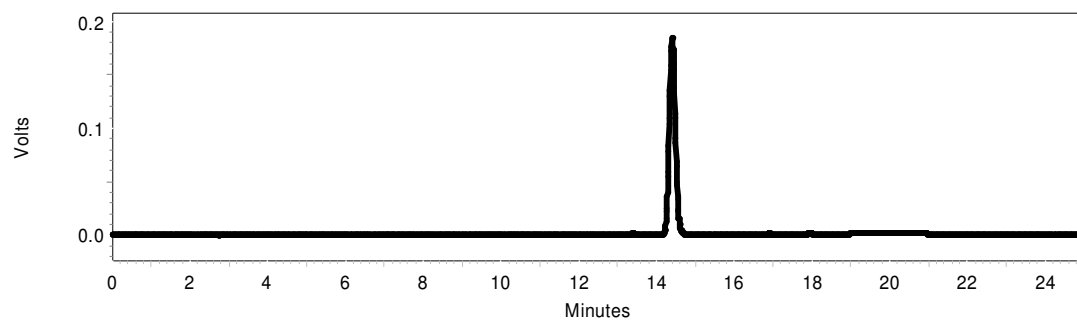

24

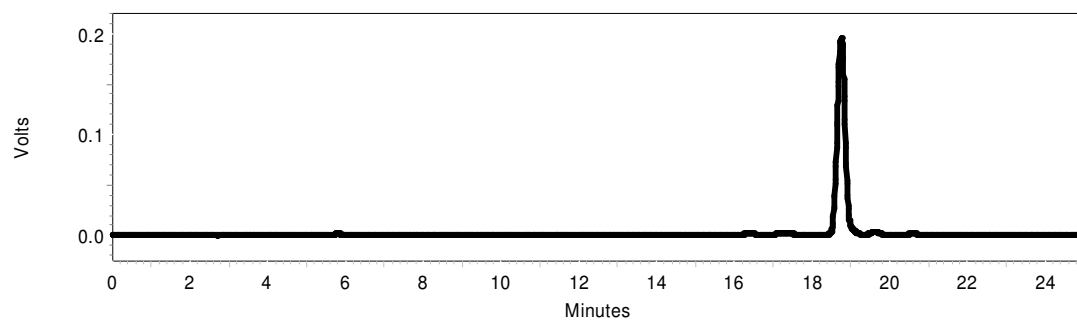

25

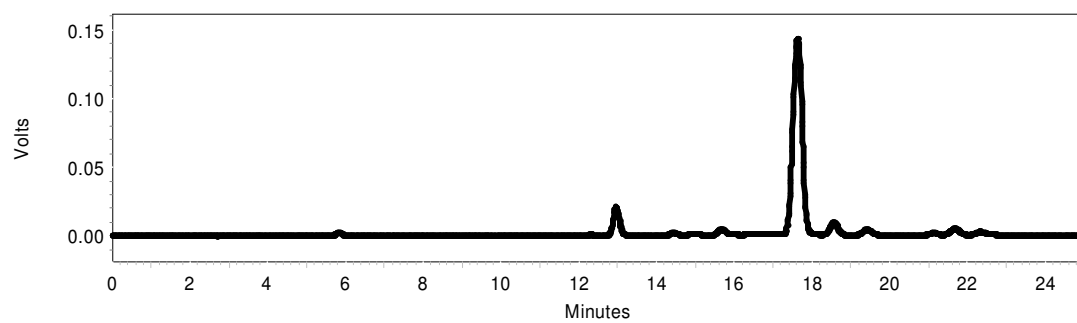

26

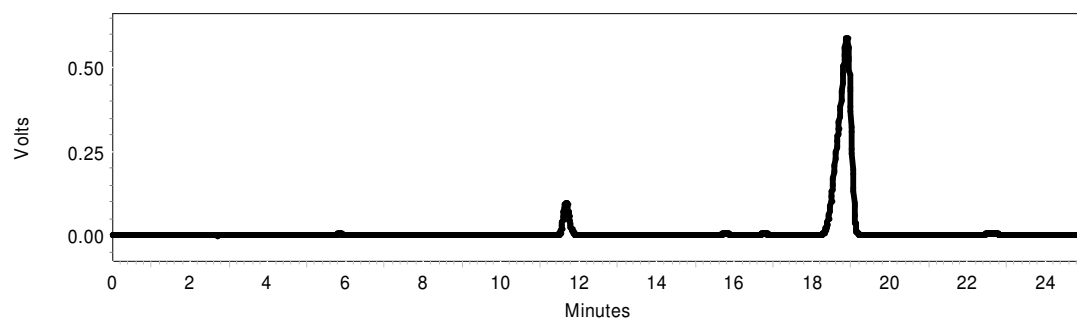

## Part II

MALDI-TOF spectra of GGAEAB glycan **1-26**:

Matrix: 2,5-dihydroxybenzoic acid (DHB);

Mode: Reflective and Positive;

Protonated ion, mono- and di-sodiated ion frequently occurred in the same spectra.

GGAEAB **1** (top) to **9** (bottom):

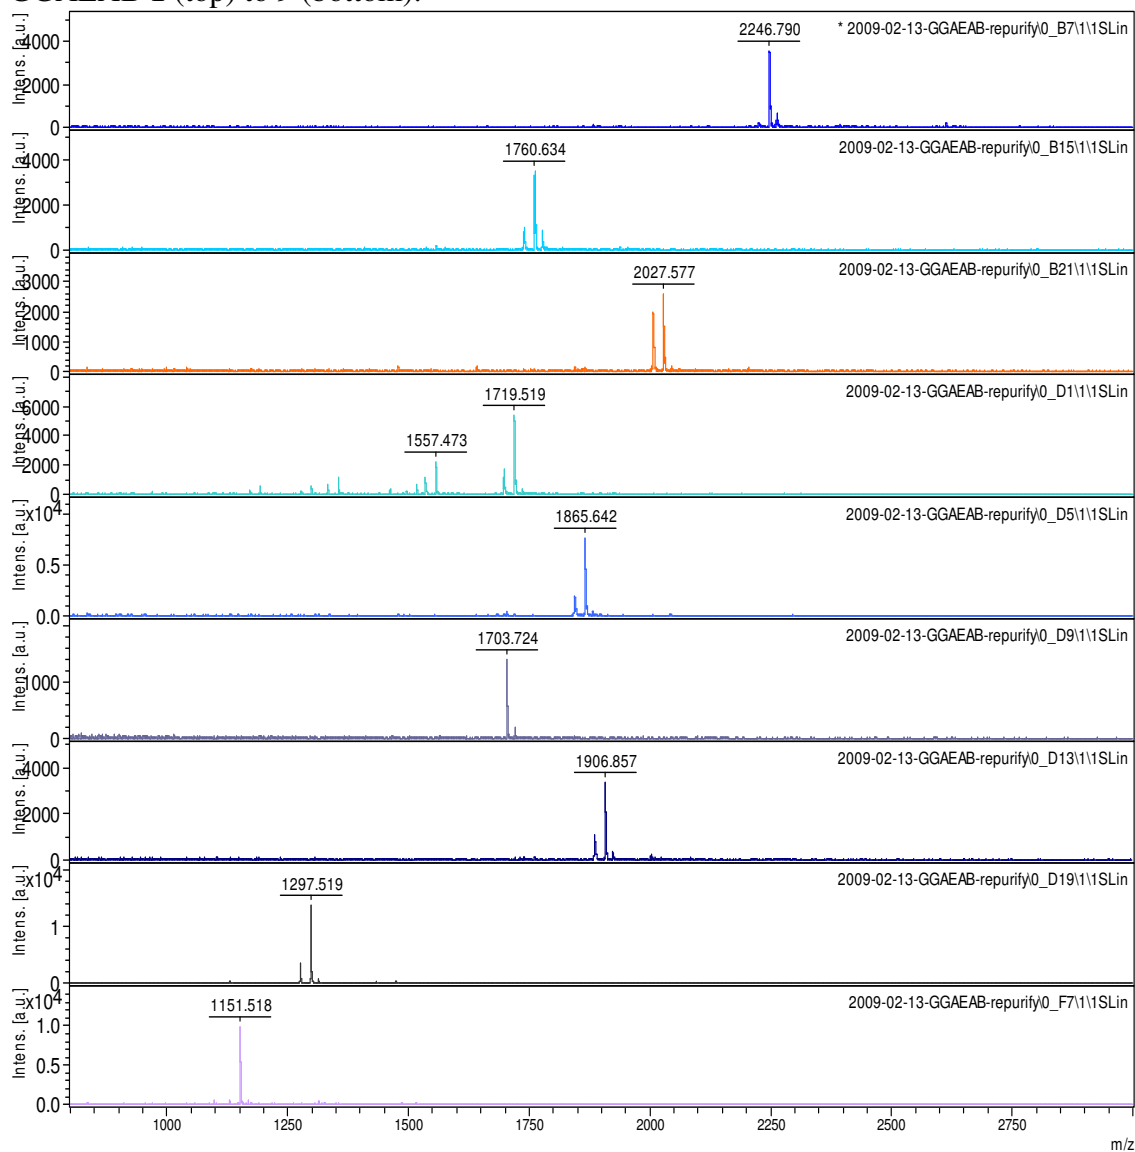



GGAEAB **10** (top) to **18** (bottom):

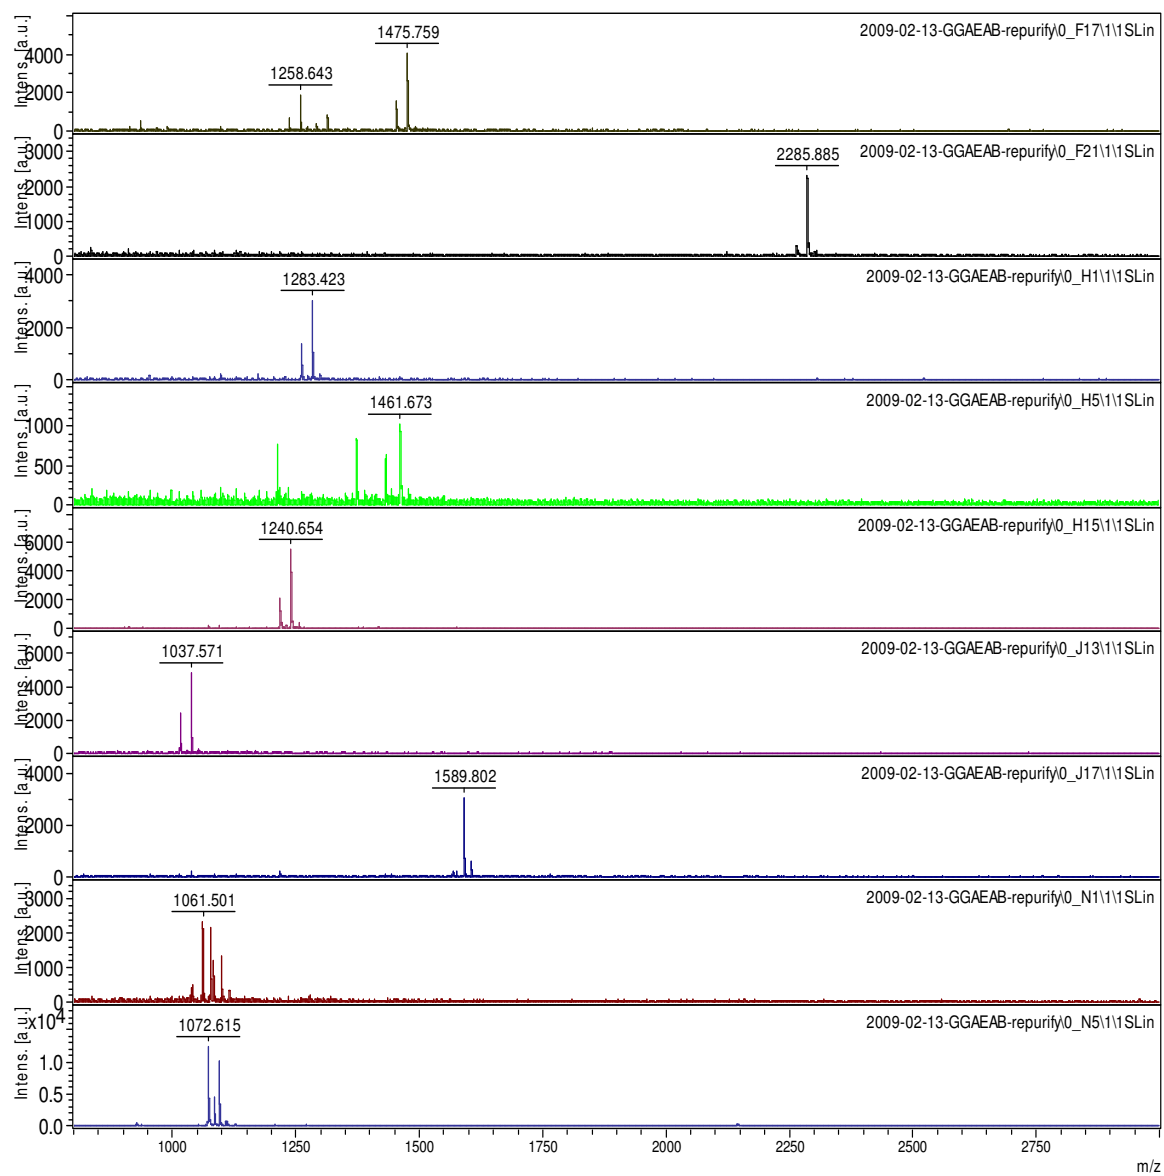

GGAEAB **19** (top) to **26** (bottom):

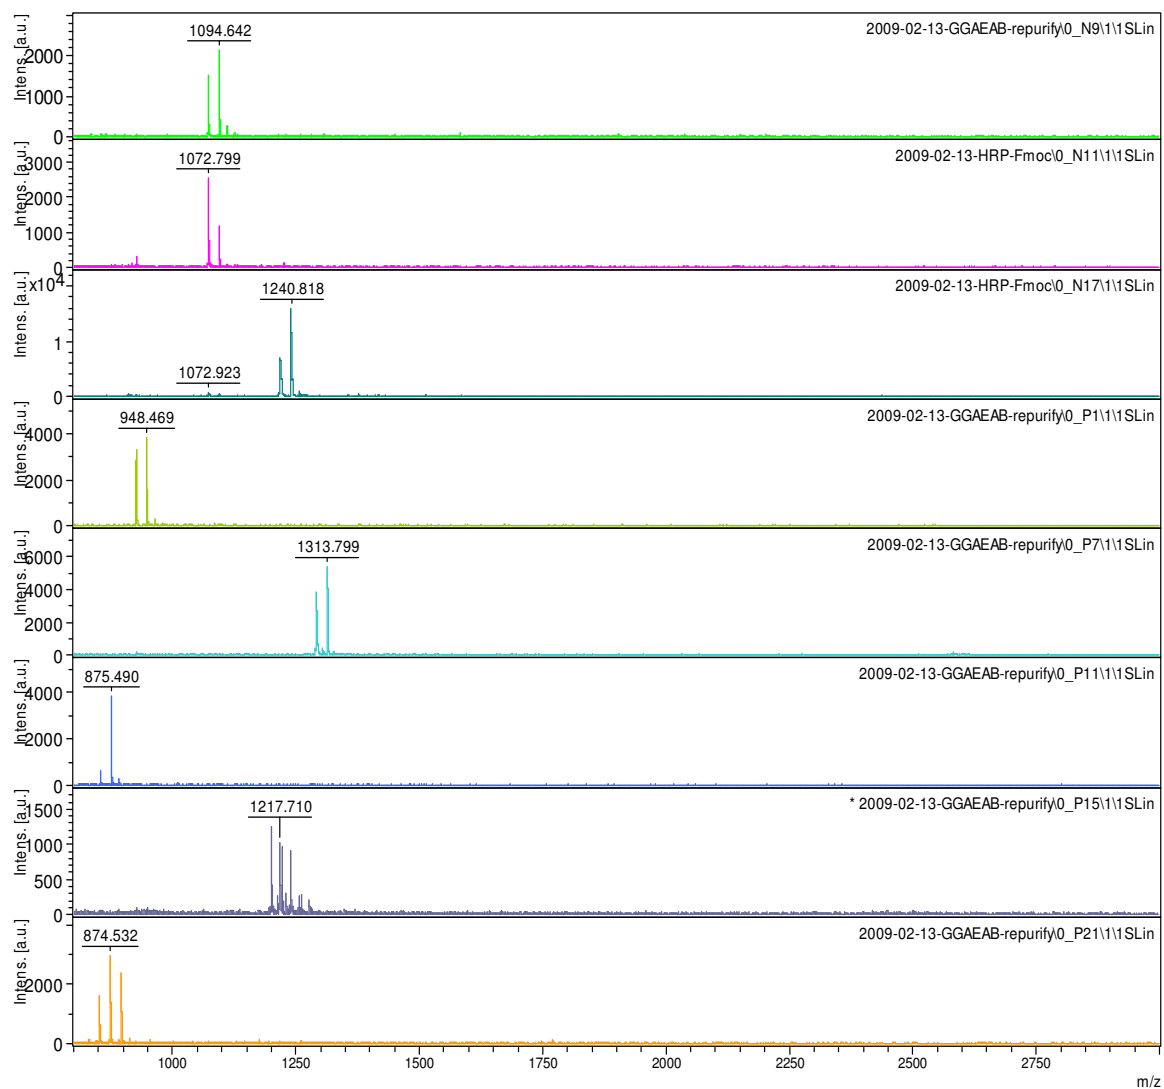

### Part III

#### Preparation of Lactose-GGAEAB:

$\alpha$ -Lactose monohydrate (35mg) was mixed with ammonium bicarbonate (600 mg) and water (300  $\mu$ L). The mixture was heated at 55°C for 1.5 hours. Water (300  $\mu$ L) was added in and the mixture was quickly filtered through a centrifuge filter with 0.22  $\mu$ m nylon membrane at 5000g. The filtrate was loaded onto a Biobasic SEC-60 HPLC column and eluted with 10 mM ammonium bicarbonate. Eluent (3.5 min to 7 min) was collected and lyophilized. To the lyophilized material, sodium bicarbonate (1.0g), ice/cold water (2 mL) and acryloyl chloride (300  $\mu$ L) were added quickly and stirred vigorously for 30 minutes. The mixture was filtered through a centrifuge filter with 0.22  $\mu$ m nylon membrane at 5000g. The filtrate was loaded onto a Biobasic SEC-60 HPLC column and eluted with 50 mM pyridinium acetate buffer (pH 5.4). Eluent (3.5 min to 7 min) was collected and lyophilized. . To the lyophilized material, methanol (5 mL) was added. The mixture was cooled in dry ice/acetone bath. Ozone was bubbled through the solution until the blue color remains (~ 1 min). The solution was brought to room temperature and methyl sulfide (500  $\mu$ L) was added. The mixture was incubated at room temperature for 8 hours and dried in a Centra-vap. To the dried material, 200 mg AEAB and 145 mg NaCNBH<sub>3</sub> were added with 4 mL DMSO/AcOH (v/v=7/3). The mixture was stirred and heated at 65°C for 2 hours. Acetonitrile (40 mL) was added in and the mixture was cooled at -20°C for 30 minutes. The mixture was centrifuged and the supernatant was discarded. The pellet was dried in the Centra-vap briefly and dissolved in water (1 mL). This material was again purified on a Biobasic SEC-60 HPLC column with 50 mM pyridinium acetate buffer (pH 5.4) as eluent. The eluent (4.4min to 5.5 min) was collected and lyophilized to give the product (22 mg). This is a mixture of lactose-AEAB/ $\beta$ -lactose-GGAEAB/ $\alpha$ -lactose-GGAEAB (12.5/81.1/6.4 by HPLC) as shown in NMR, MS and HPLC.

For NMR, the dried sample was dissolved in D<sub>2</sub>O (0.5 mL) and lyophilized. This was repeated twice. The final sample was dissolved in D<sub>2</sub>O (0.7 mL).

Lactose-AEAB conjugates were prepared by direct reductive amination with AEAB and NaCNBH<sub>3</sub> as described above.

Lactose-GGAEAB (1H, 400MHz, D<sub>2</sub>O)

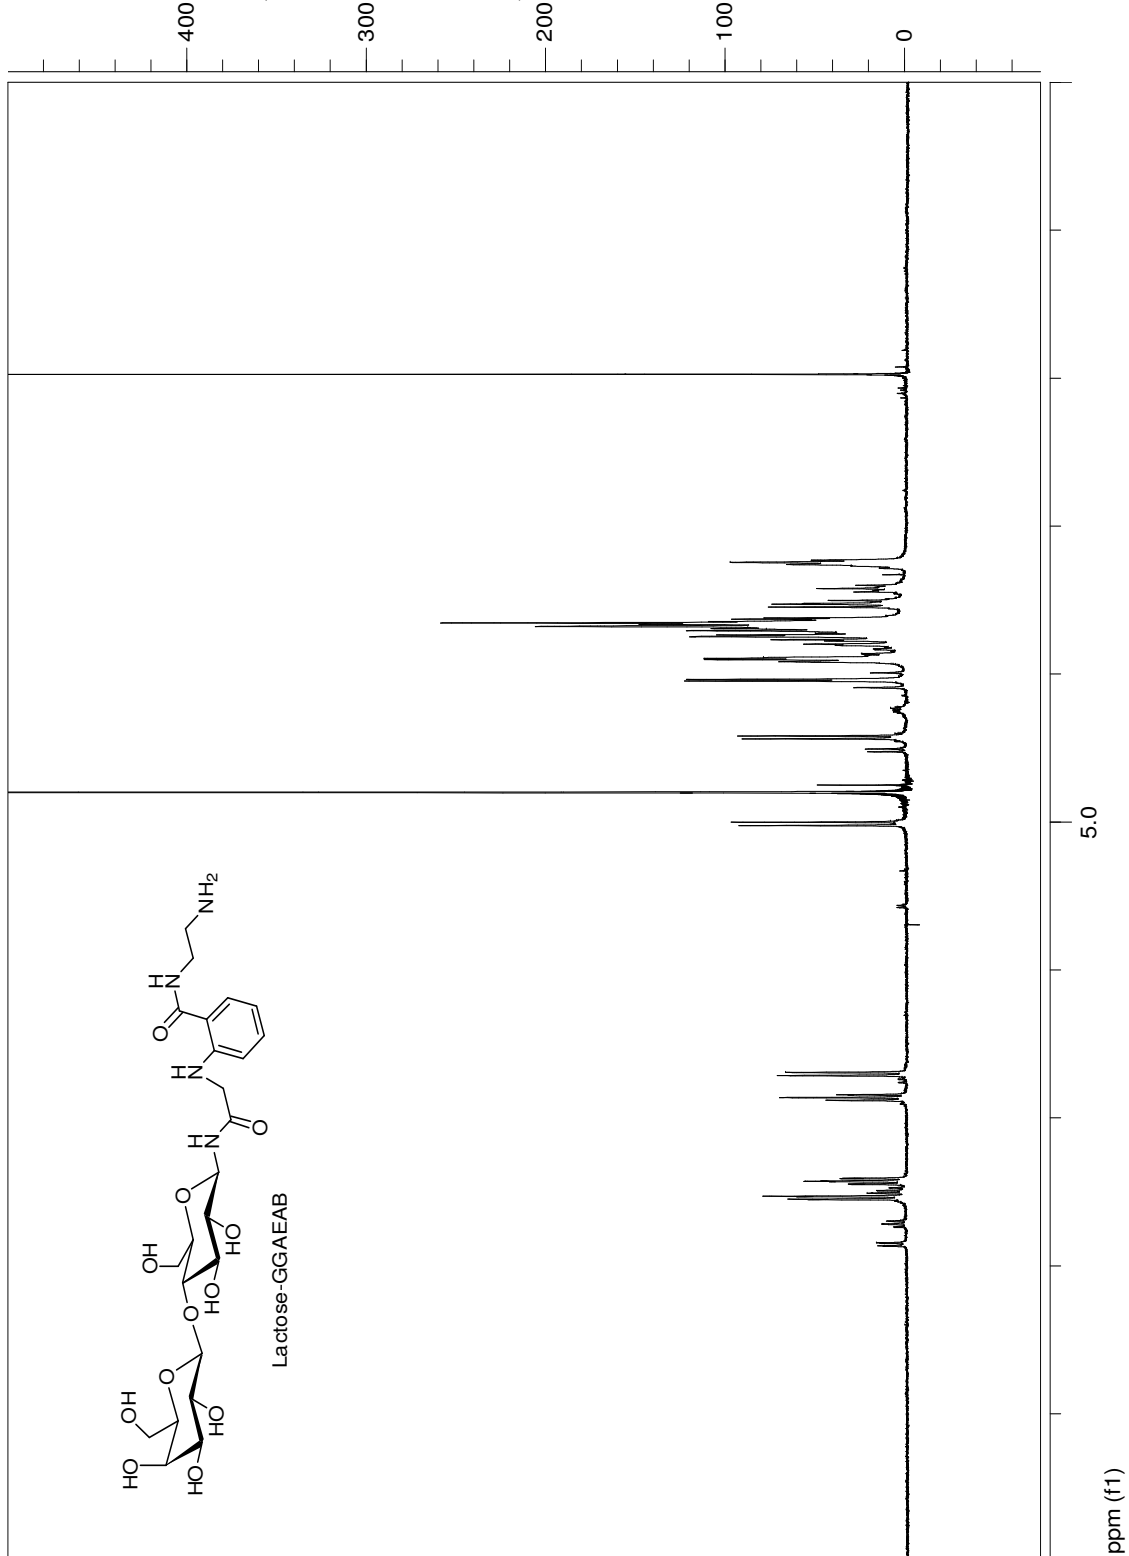

Lactose-GGAEAB ( $^{13}\text{C}$ , 100MHz,  $\text{D}_2\text{O}$  )

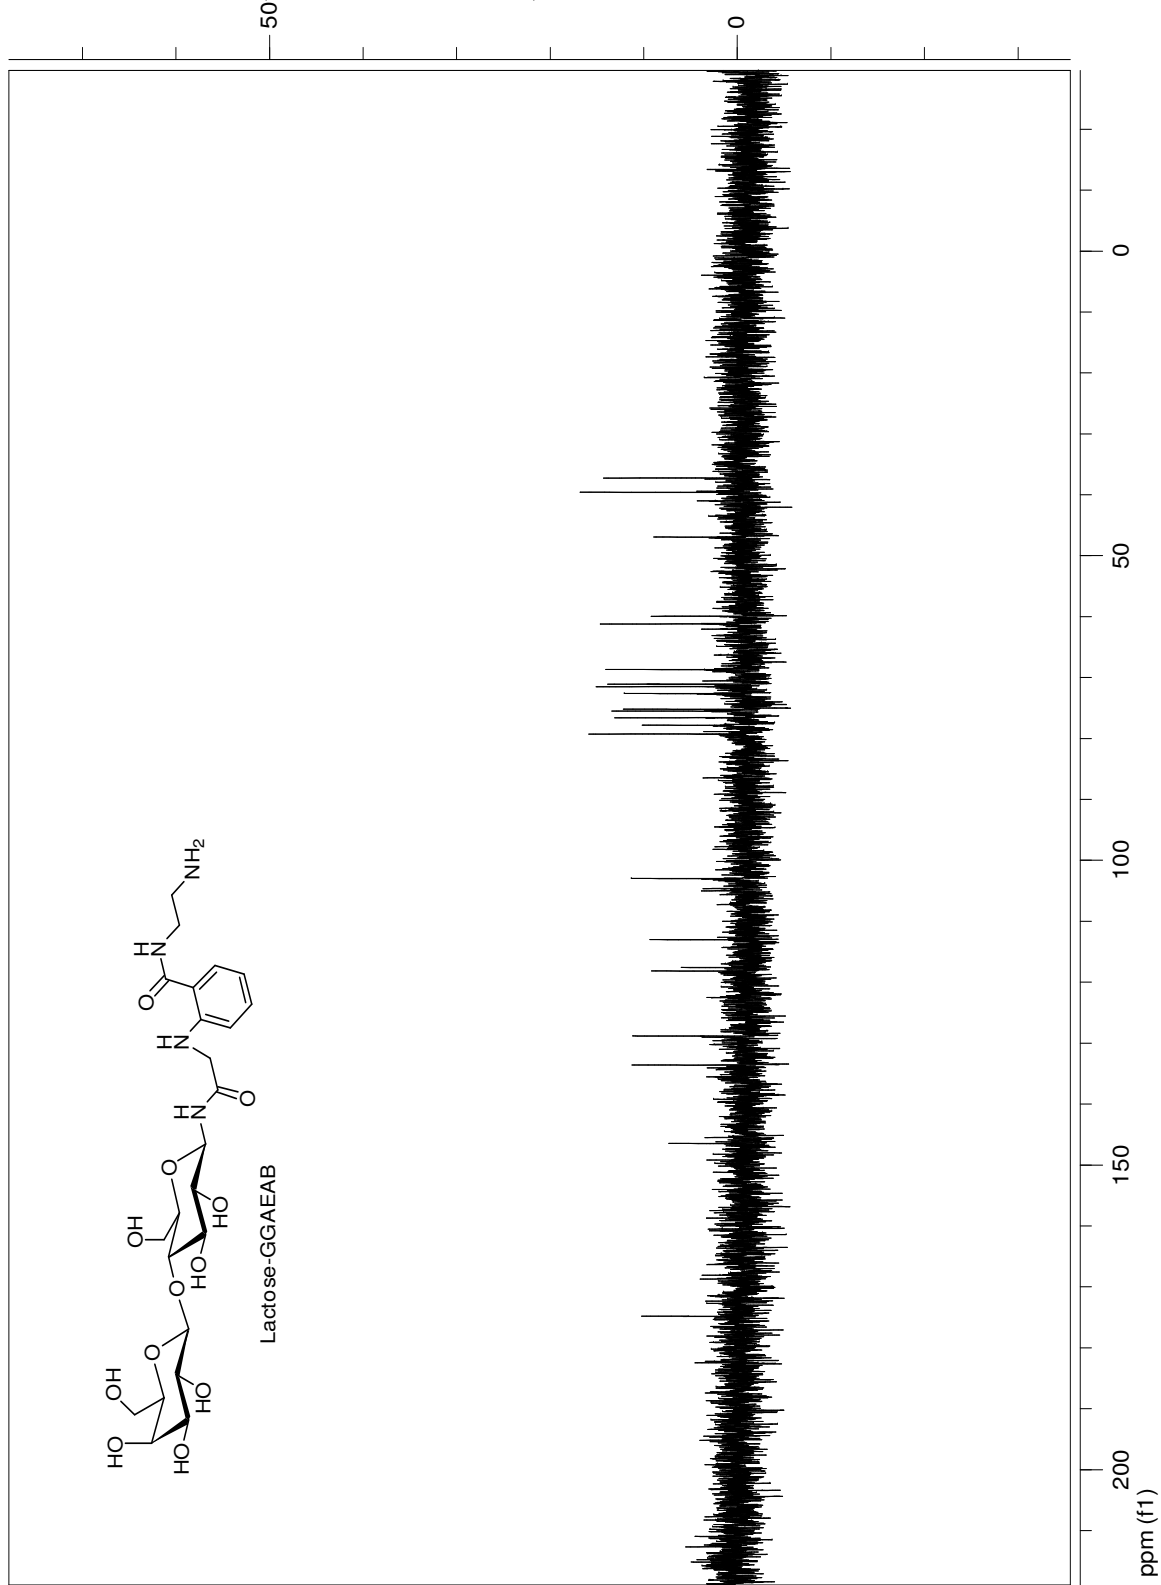

Lactose-AEAB (1H, 400MHz, D<sub>2</sub>O ):

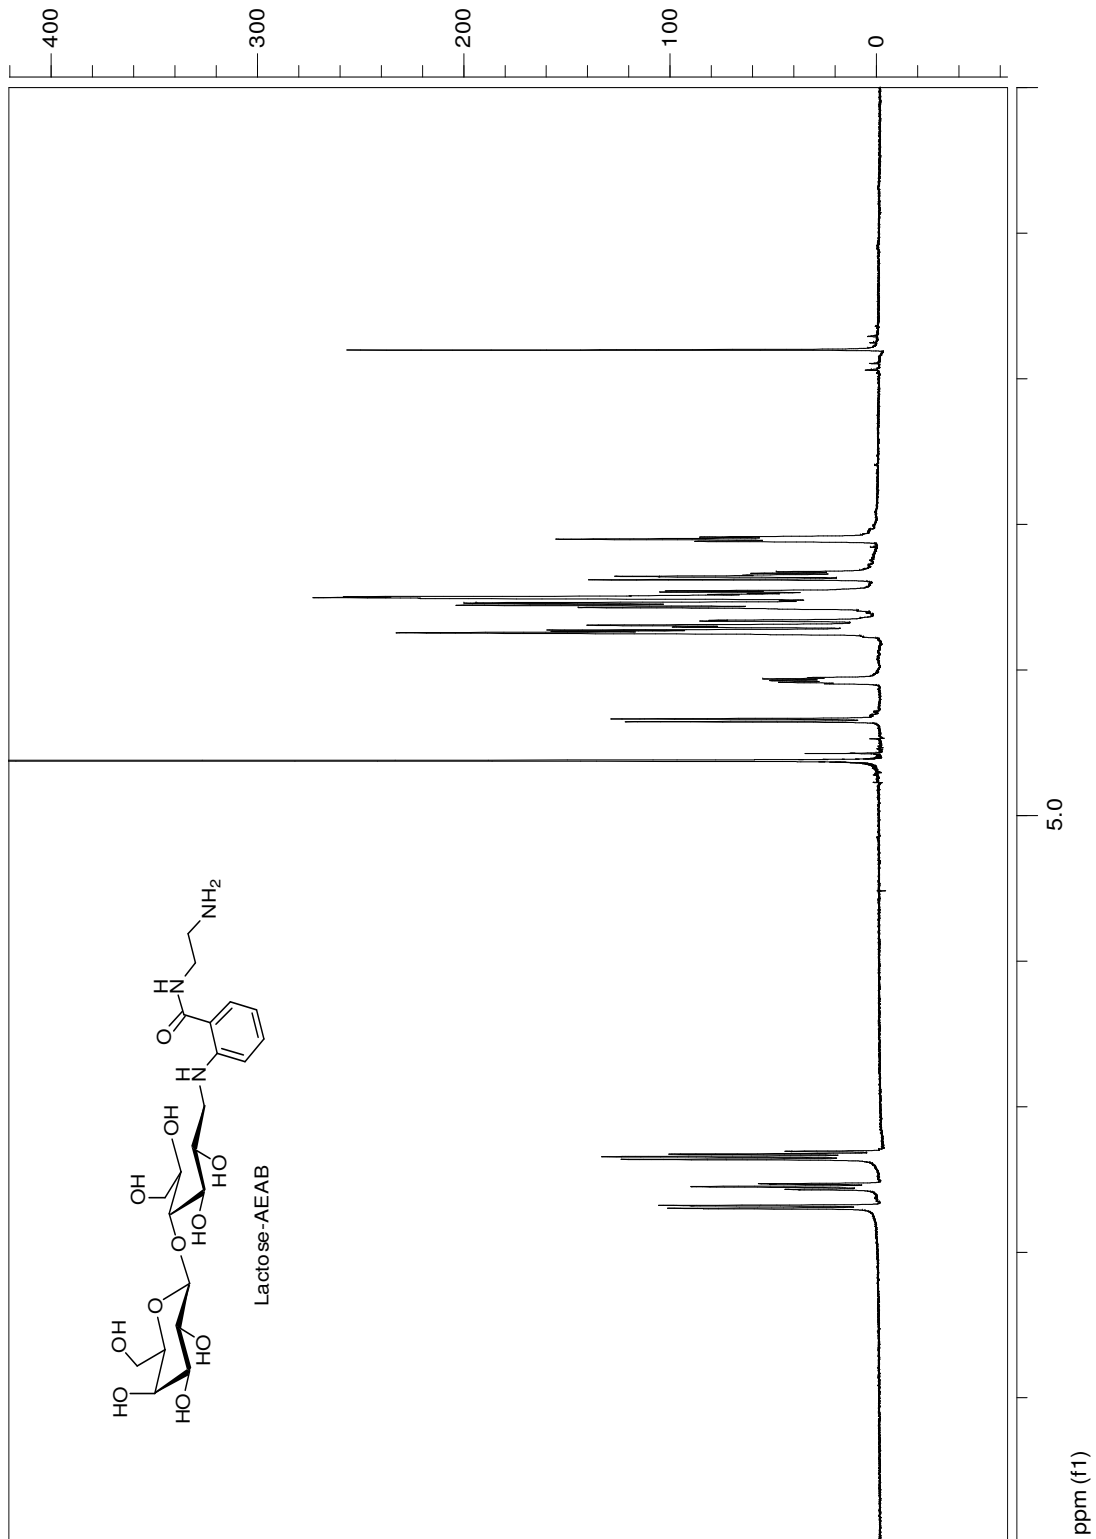

Lactose-AEAB (13C, 100MHz, D<sub>2</sub>O )

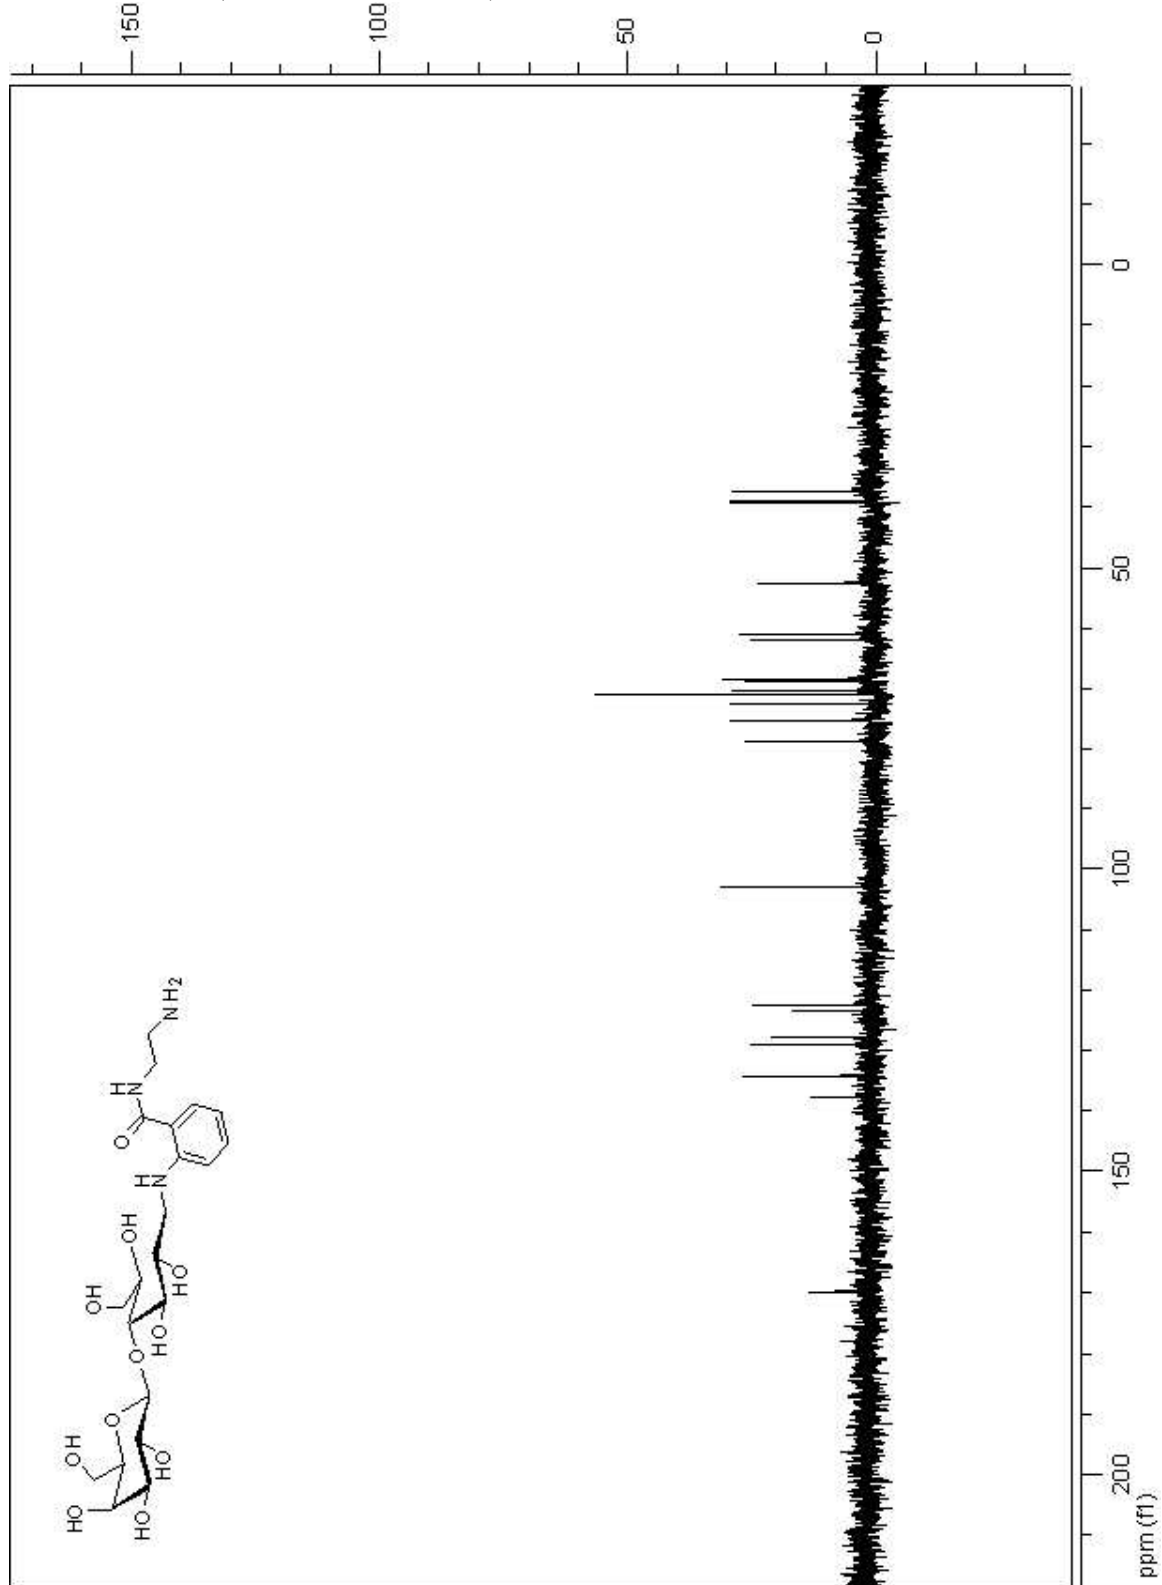

MALDI-TOF of lactose-AEAB and lactose-GGAEAB:

Lactose-AEAB [M+H]<sup>+</sup>: Calc. 506.2344, found 506.2276;

Lactose-GGAEAB [M+H]<sup>+</sup>: Calc. 561.2402, found 561.2863.

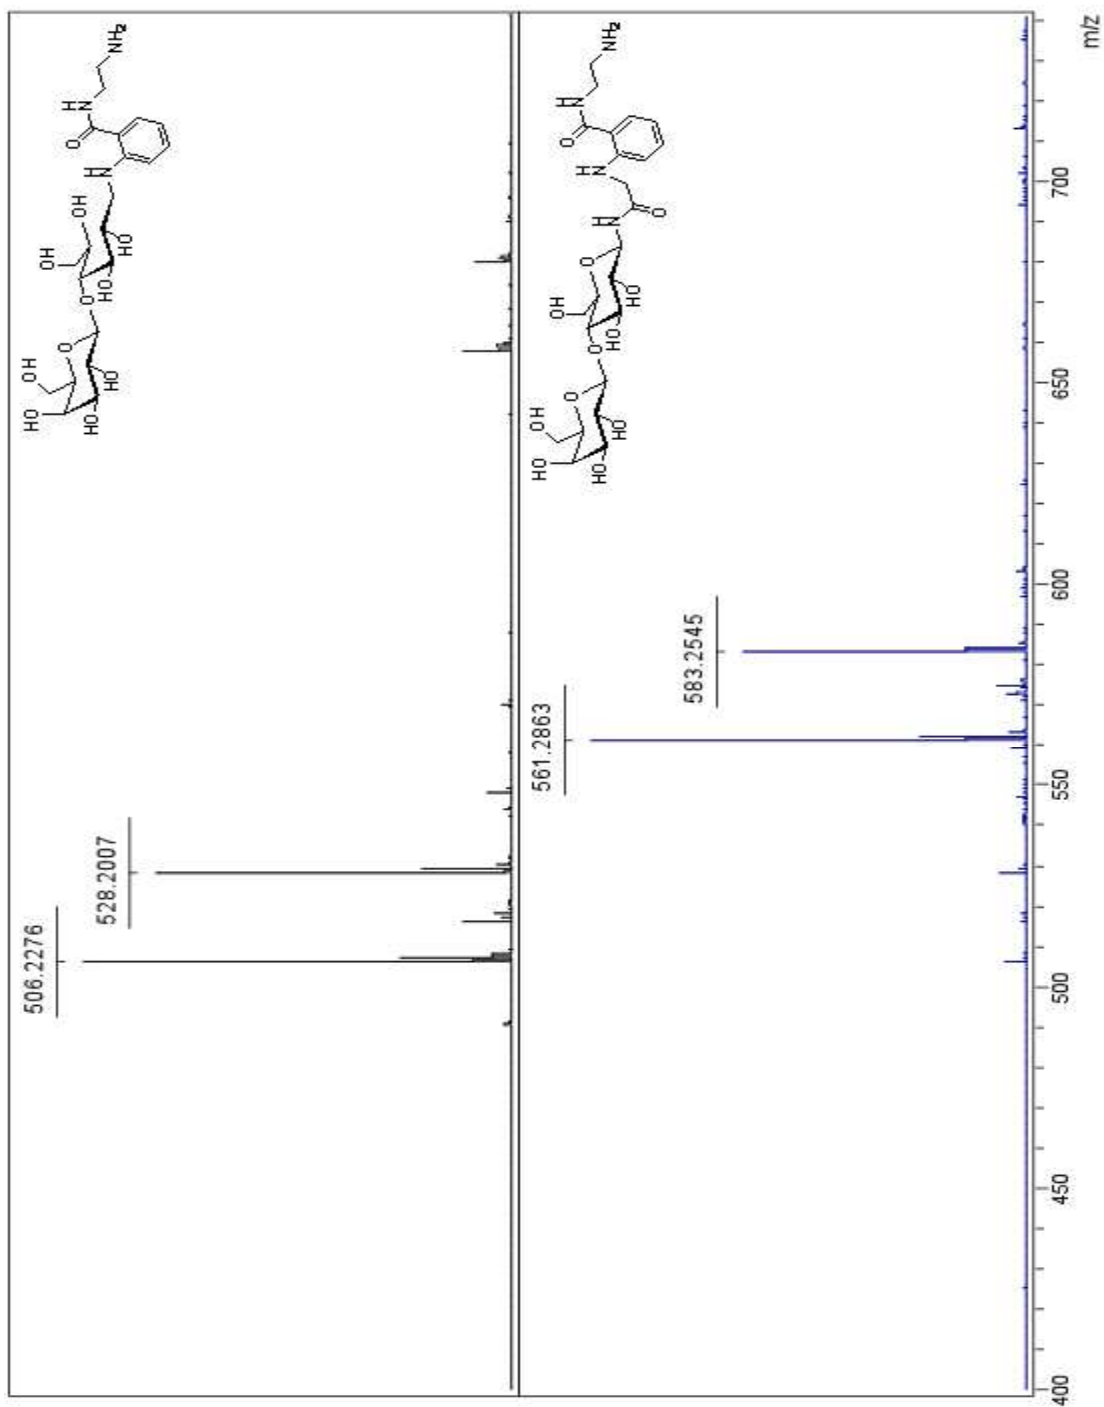



Comparison of anomeric range (4.2-5.2 ppm) of lactose-GGAEAB and lactose-AEAB:

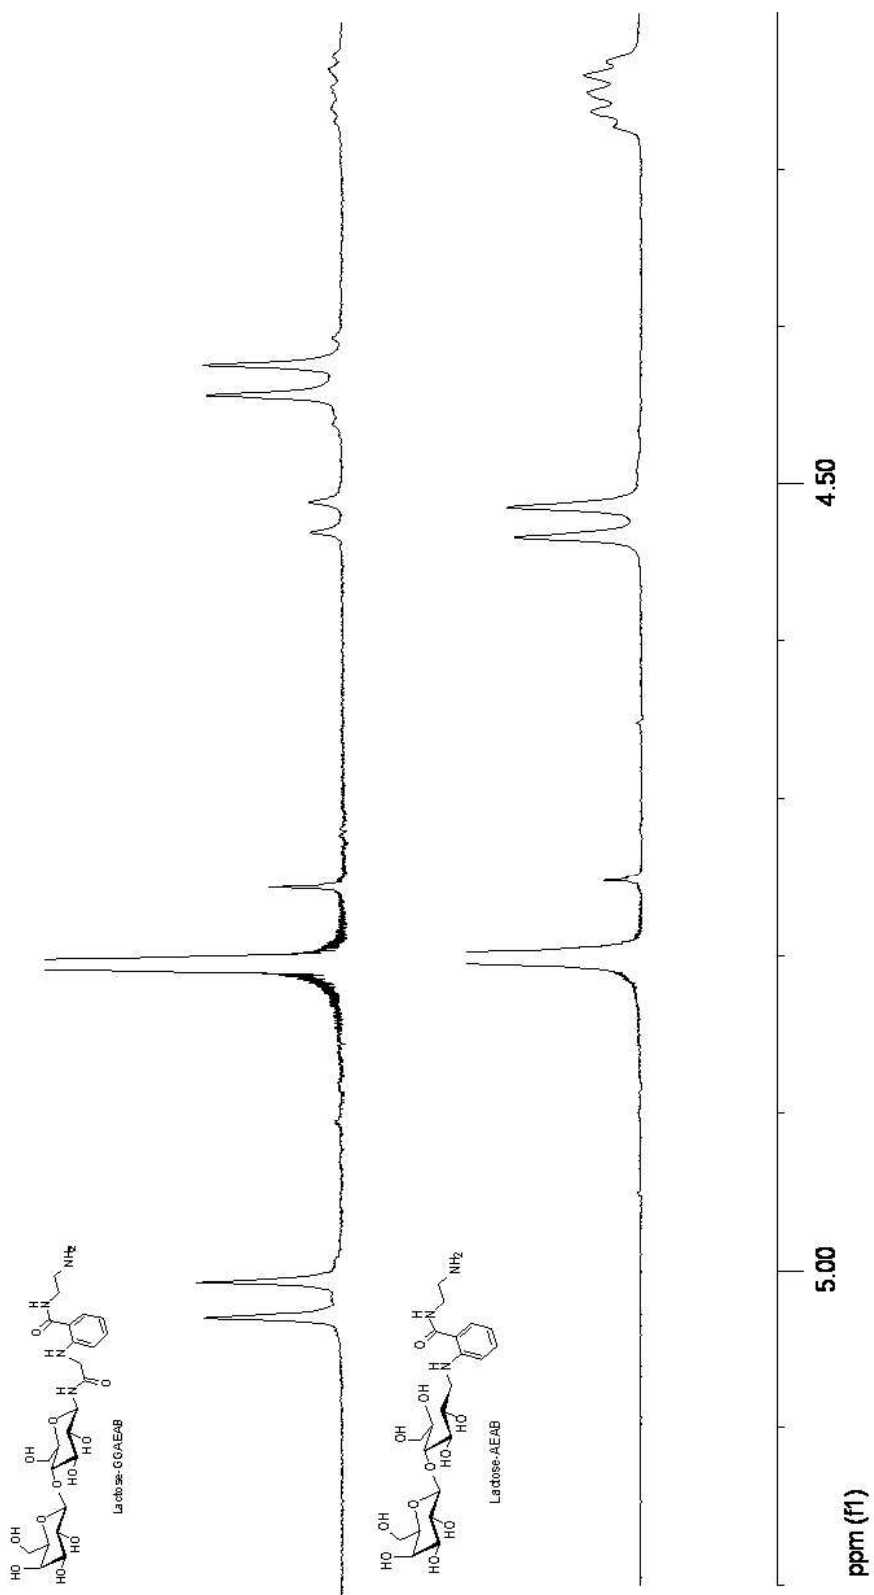

Comparison of anomeric range (4.2-5.2 ppm) of Lac-GGAEAB and Lac-AEAB. The reducing end anomeric proton was retained in the closed-ring structure

Comparison of PGC-HPLC profiles of lactose-GGAEAB and lactose-AEAB:

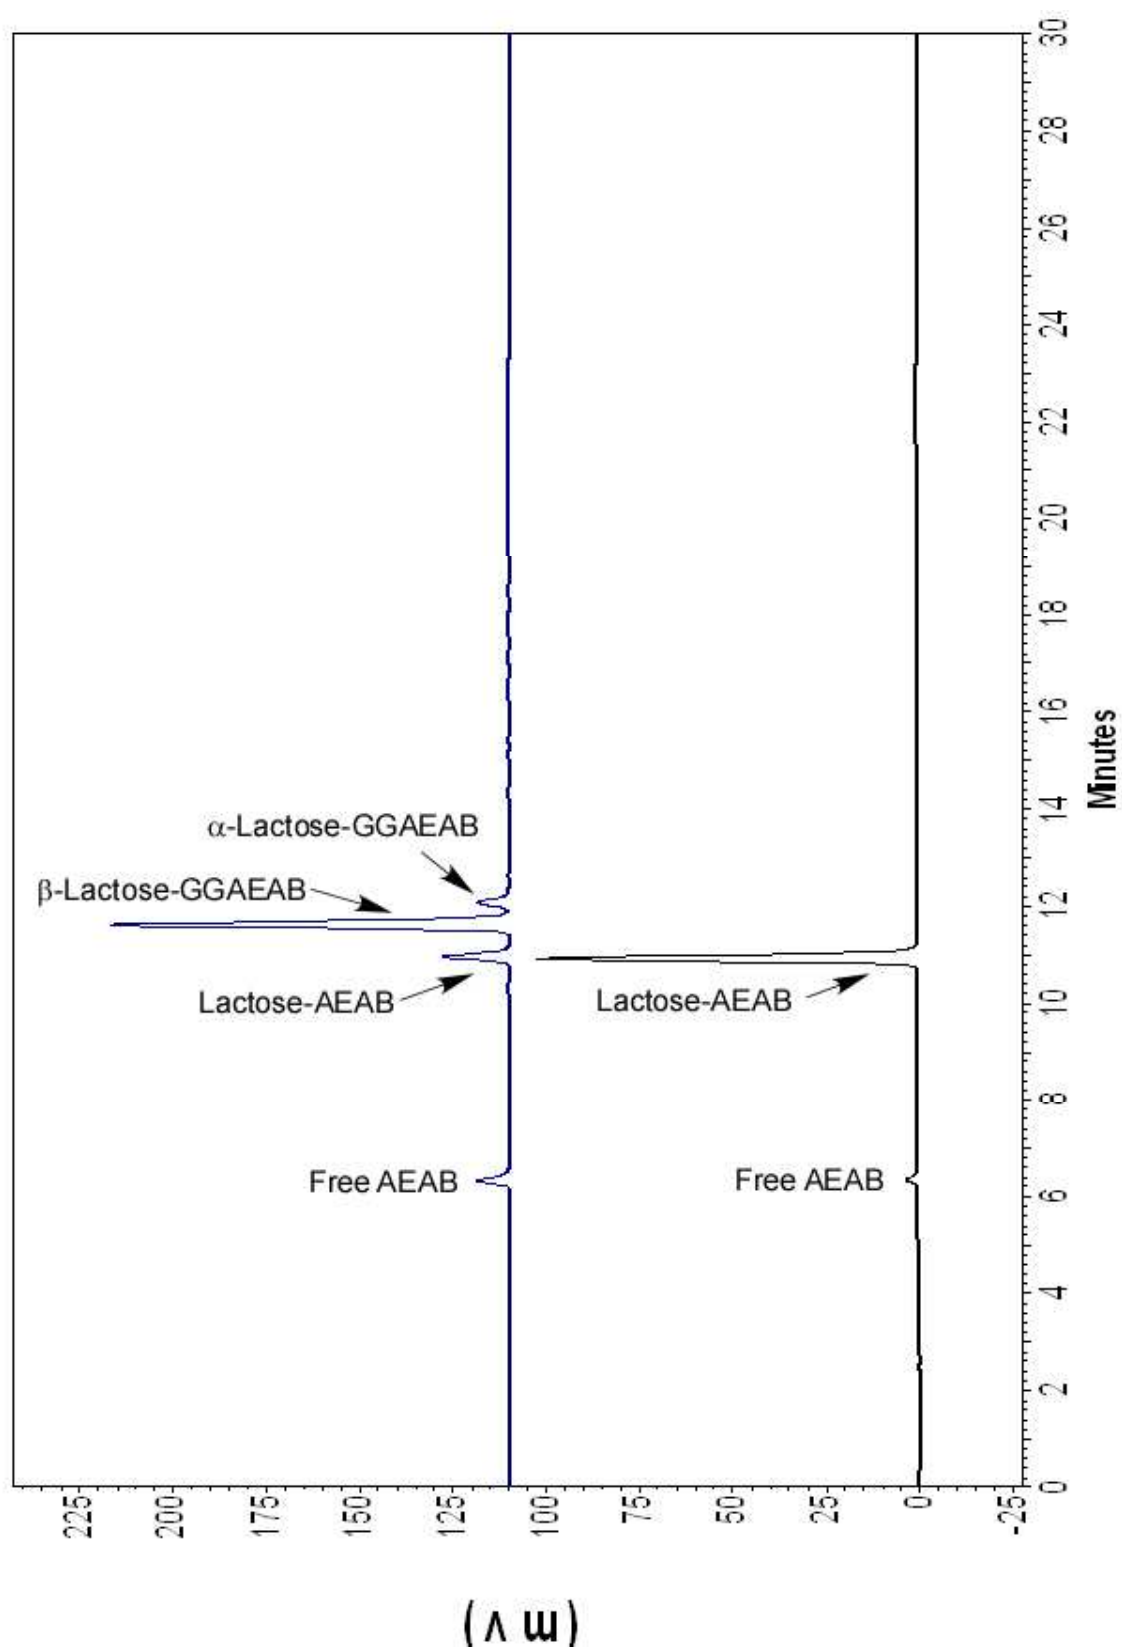

Supplement: Supplementary file 1 [file 3582654]
